11. Evered L, Silbert B, Scott DA, Ames D, Maruff P, Blennow K: Cerebrospinal fluid biomarker for Alzheimer disease predicts postoperative cognitive dysfunction. *ANESTHESIOLOGY* 2016; 124:353–61

(Accepted for publication April 20, 2016.)

# *In Reply:*

We thank Drs. Eckenhoff, Evered, and Hogan for engaging in an important debate on the issues we raised in our editorial, “The Fallacy of Persistent Postoperative Cognitive Decline.”<sup>1</sup> Their letter challenges several aspects of our editorial including (1) our use of the word “fallacy”; (2) the content of our analysis; and (3) the logic of our argument. We welcome the opportunity to sequentially respond to each of these points.

First, we stand by our use of the word fallacy. To be clear, we are not asserting that the existence of persistent postoperative cognitive decline (POCD) has been definitively refuted, and is thus fallacious. Rather, our editorial suggests that persistent POCD is likely a *post hoc, ergo propter hoc* (after this, therefore because of this) misattribution fallacy. The fallacy is to assume causation purely on the basis of a temporal relationship. A relevant example of this type of fallacy is the assertion that measles vaccine causes autism. There is currently an alarming increase in the prevalence of autism spectrum disorders. Largely uncontrolled observational research has implicated measles vaccination, and tellingly, there are compelling anecdotes of toddlers who are cognitively normal before their vaccine and who shortly after become neurodevelopmentally impaired.<sup>2</sup> Yet, based on the preponderance of evidence,<sup>3</sup> most scientists are convinced that it is incorrect to attribute autism to measles vaccination. There is similarly an alarming increase in the prevalence of cognitive decline among older adults. Highly publicized uncontrolled observational studies have implicated surgery and anesthesia,<sup>4,5</sup> and tellingly, there are compelling anecdotes of older adults who are cognitively normal before surgery, and thereafter rapidly become demented. Yet, based on the preponderance of evidence referred to in our editorial,<sup>1</sup> we suggest that it is likely a fallacy to attribute persistent cognitive decline or incident dementia to uncomplicated surgery with general anesthesia.

Eckenhoff, Evered, and Hogan also challenge the content of our editorial, charging that we have misinterpreted non-significant results as evidence of a negligible effect.<sup>6</sup> In citing selected examples, they point out that some of the studies on persistent POCD have found clinically significant, although statistically nonsignificant, results. They suggest that these studies have been underpowered (or too small), explaining why their results have not been statistically significant. There are two problems with their contention. The first is that meta-analyses including these very studies do not cumulatively find a statistically or clinically significant association between surgery/anesthesia and persistent POCD.<sup>7</sup>

The second is the misconception that studies that do not find statistically significant results are necessarily underpowered.<sup>8</sup> The calculation of power after a study is completed is considered inappropriate, and confidence intervals are more informative.<sup>8</sup> An assumption is often made that a larger study would reveal both a statistically and a clinically significant result. However, small studies often find large effect sizes, which are not replicated in larger, more rigorous trials.<sup>9</sup> Indeed, it is frequently the case that when larger studies are conducted, strikingly large effects that were found in small trials vanish into clinical insignificance.<sup>9</sup> In a similar vein, it is also an error to conflate statistical and clinical significance. Eckenhoff, Evered, and Hogan ask on which side of the pyramid the study by Dokkedal *et al.*<sup>10</sup> should be placed, because it found some statistically significant, but clinically irrelevant, results. The answer is that a result that is less than the minimum clinically important difference should be viewed as a negative result. It is unsurprising that a large study with multiple statistical tests finds some statistically significant, albeit clinically negligible, results.

Finally, Eckenhoff, Evered, and Hogan challenge our logic, asserting that the evidential pyramid is not robust and that we have not proved the case against persistent POCD. Of course, one can never prove the nonexistence of anything! The burden of proof rests on providing evidence supporting the existence of persistent POCD. In our editorial, we evaluated this evidence and found it to be weak. Analogy to the following two controversial hypotheses illustrates our logic (1) that peptic ulcer disease is caused by a bacterium and (2) that vaccination causes autism. Like persistent POCD, neither of these hypotheses can be conclusively disproved, but with appropriate experimental designs, they could be strongly corroborated (if they were true). Indeed, the first hypothesis was boldly verified by Marshall, who infected himself with *Helicobacter pylori*, and has led to better health for countless people.<sup>11</sup> The second is turning out to be a stubbornly persistent misattribution fallacy, which is leading to deadly measles outbreaks.<sup>3</sup>

Since Bedford<sup>12</sup> proposed the persistent POCD hypothesis based on an uncontrolled case series in 1955, there have been numerous attempts to verify it. However, not even randomized controlled trials,<sup>13–15</sup> comparing cardiac surgery patients (those considered to be at highest risk for persistent POCD) with patients undergoing percutaneous coronary intervention, have found evidence for persistent POCD. In fact, some of these studies found cognitive improvement after cardiac surgery.<sup>16</sup> We are concerned that, despite the lack of corroboratory evidence, the misattribution fallacy endures in the popular press and in the medical community, and fear of persistent POCD dissuades many older adults from undergoing life-enhancing, elective surgery.

In conclusion, society has limited resources for research, and it is important that common public health problems are prioritized. Even if persistent POCD does occur, Eckenhoff, Evered, and Hogan concede that it is likely to be too rare for

detection in randomized controlled trials, and instead they advocate large (expensive) prospective, observational cohort experimental designs. A 3,988-patient prospective cohort trial, published after our editorial, reinforces the evidence finding no indication of persistent cognitive decline or incident dementia attributable to surgery.<sup>17</sup> In fact, its only significant finding was that patients with exposure to surgery and general anesthesia had a decreased risk of dementia.<sup>17</sup>

### Competing Interests

The authors declare no competing interests.

**Michael S. Avidan, M.B.B.Ch., F.C.A.S.A., Alex S. Evers, M.D.** Washington University School of Medicine, St. Louis, Missouri (M.S.A.). avidanm@anest.wustl.edu

### References

1. Avidan MS, Evers AS: The fallacy of persistent postoperative cognitive decline. *ANESTHESIOLOGY* 2016; 124:255–8
2. Doja A, Roberts W: Immunizations and autism: A review of the literature. *Can J Neurol Sci* 2006; 33:341–6
3. Taylor LE, Swerdfeger AL, Eslick GD: Vaccines are not associated with autism: An evidence-based meta-analysis of case-control and cohort studies. *Vaccine* 2014; 32:3623–9
4. Newman MF, Kirchner JL, Phillips-Bute B, Gaver V, Grocott H, Jones RH, Mark DB, Reves JG, Blumenthal JA; Neurological Outcome Research Group and the Cardiothoracic Anesthesiology Research Endeavors Investigators: Longitudinal assessment of neurocognitive function after coronary-artery bypass surgery. *N Engl J Med* 2001; 344:395–402
5. McDonagh DL, Mathew JP, White WD, Phillips-Bute B, Laskowitz DT, Podgoreanu MV, Newman MF; Neurologic Outcome Research Group: Cognitive function after major noncardiac surgery, apolipoprotein E4 genotype, and biomarkers of brain injury. *ANESTHESIOLOGY* 2010; 112:852–9
6. Kühnberger A, Fritz A, Lermer E, Scherndl T: The significance fallacy in inferential statistics. *BMC Res Notes* 2015; 8:84
7. Seitz DP, Shah PS, Herrmann N, Beyene J, Siddiqui N: Exposure to general anesthesia and risk of Alzheimer's disease: A systematic review and meta-analysis. *BMC Geriatr* 2011; 11:83
8. Goodman SN, Berlin JA: The use of predicted confidence intervals when planning experiments and the misuse of power when interpreting results. *Ann Intern Med* 1994; 121:200–6
9. Button KS, Ioannidis JP, Mokrysz C, Nosek BA, Flint J, Robinson ES, Munafò MR: Power failure: Why small sample size undermines the reliability of neuroscience. *Nat Rev Neurosci* 2013; 14:365–76
10. Dokkedal U, Hansen TG, Rasmussen LS, Mengel-From J, Christensen K: Cognitive functioning after surgery in middle-aged and elderly Danish twins. *ANESTHESIOLOGY* 2016; 124:312–21
11. Ahmed N: 23 years of the discovery of *Helicobacter pylori*: Is the debate over? *Ann Clin Microbiol Antimicrob* 2005; 4:17
12. Bedford PD: Adverse cerebral effects of anaesthesia on old people. *Lancet* 1955; 269:259–63
13. Sauë AM, Nathoe HM, Hendrikse J, Peelen LM, Regieli J, Veldhuijzen DS, Kalkman CJ, Grobbee DE, Doevendans PA, van Dijk D; Octopus Study Group: Cognitive outcomes 7.5 years after angioplasty compared with off-pump coronary bypass surgery. *Ann Thorac Surg* 2013; 96:1294–300
14. Hlatky MA, Bacon C, Boothroyd D, Mahanna E, Reves JG, Newman MF, Johnstone I, Winston C, Brooks MM, Rosen AD, Mark DB, Pitt B, Rogers W, Ryan T, Wiens R, Blumenthal JA: Cognitive function 5 years after randomization to coronary angioplasty or coronary artery bypass graft surgery. *Circulation* 1997; 96(9 suppl):II–11
15. Währborg P, Booth JE, Clayton T, Nugara F, Pepper J, Weintraub WS, Sigwart U, Stables RH; SoS Neuropsychology Substudy Investigators: Neuropsychological outcome after percutaneous coronary intervention or coronary artery bypass grafting: Results from the Stent or Surgery (SoS) Trial. *Circulation* 2004; 110:3411–7
16. Cormack F, Shipolini A, Awad WI, Richardson C, McCormack DJ, Colleoni L, Underwood M, Baldeweg T, Hogan AM: A meta-analysis of cognitive outcome following coronary artery bypass graft surgery. *Neurosci Biobehav Rev* 2012; 36:2118–29
17. Aiello Bowles EJ, Larson EB, Pong RP, Walker RL, Anderson ML, Yu O, Gray SL, Crane PK, Dublin S: Anesthesia exposure and risk of dementia and Alzheimer's disease: A prospective study. *J Am Geriatr Soc* 2016; 64:602–77

(Accepted for publication April 20, 2016.)

## Evaluation of Perioperative Medication Errors

### To the Editor:

The recent article by Nanji *et al.*<sup>1</sup> concerning errors related to anesthetic drug administration is interesting and raises a number of provocative questions. However, we are concerned that the manner in which the data are presented and interpreted may lead readers to conclusions that may not be warranted.

Nanji *et al.* have utilized a very broad definition of drug administration error. For example, “significant hypotension (mean arterial pressure < 55 mmHg) that is not treated”<sup>1</sup> is listed as a drug error in table 2. We would argue that depending upon the circumstances, this is not an error of drug administration (it may be an error in anesthetic management) and may not be an error at all. We would also argue that an unattended syringe of hydromorphone (table 5) is not a drug administration error, although it may be a violation of a hospital policy for handling controlled substances. The authors have given other examples of their definitions of drug administration error but have not provided a complete list of all drug error definitions or a list of the errors observed in this study. Thus, it is difficult to know what was actually measured. This is important because their reported rate of error is at least an order of magnitude greater than reported by other investigators.

Nanji *et al.* have also utilized a very broad definition of adverse drug events. We would argue that the example of adverse drug events listed in table 2, “a patient with > 4/10 pain on emergence that is not treated until after arriving in the recovery room,”<sup>1</sup> is not an adverse drug event. It has to do with the strategy for perioperative pain management rather than drug administration *per se*.

Webster *et al.*<sup>2</sup> performed a key study of anesthetic drug administration error using prospective facilitated incident
